# Supplementary material
Source: PubMed Central journal article supplement (PMC7610663)
Supplement: EMS118664-supplement-1.pdf [file EMS118664-supplement-1.pdf]

**Figure S1**

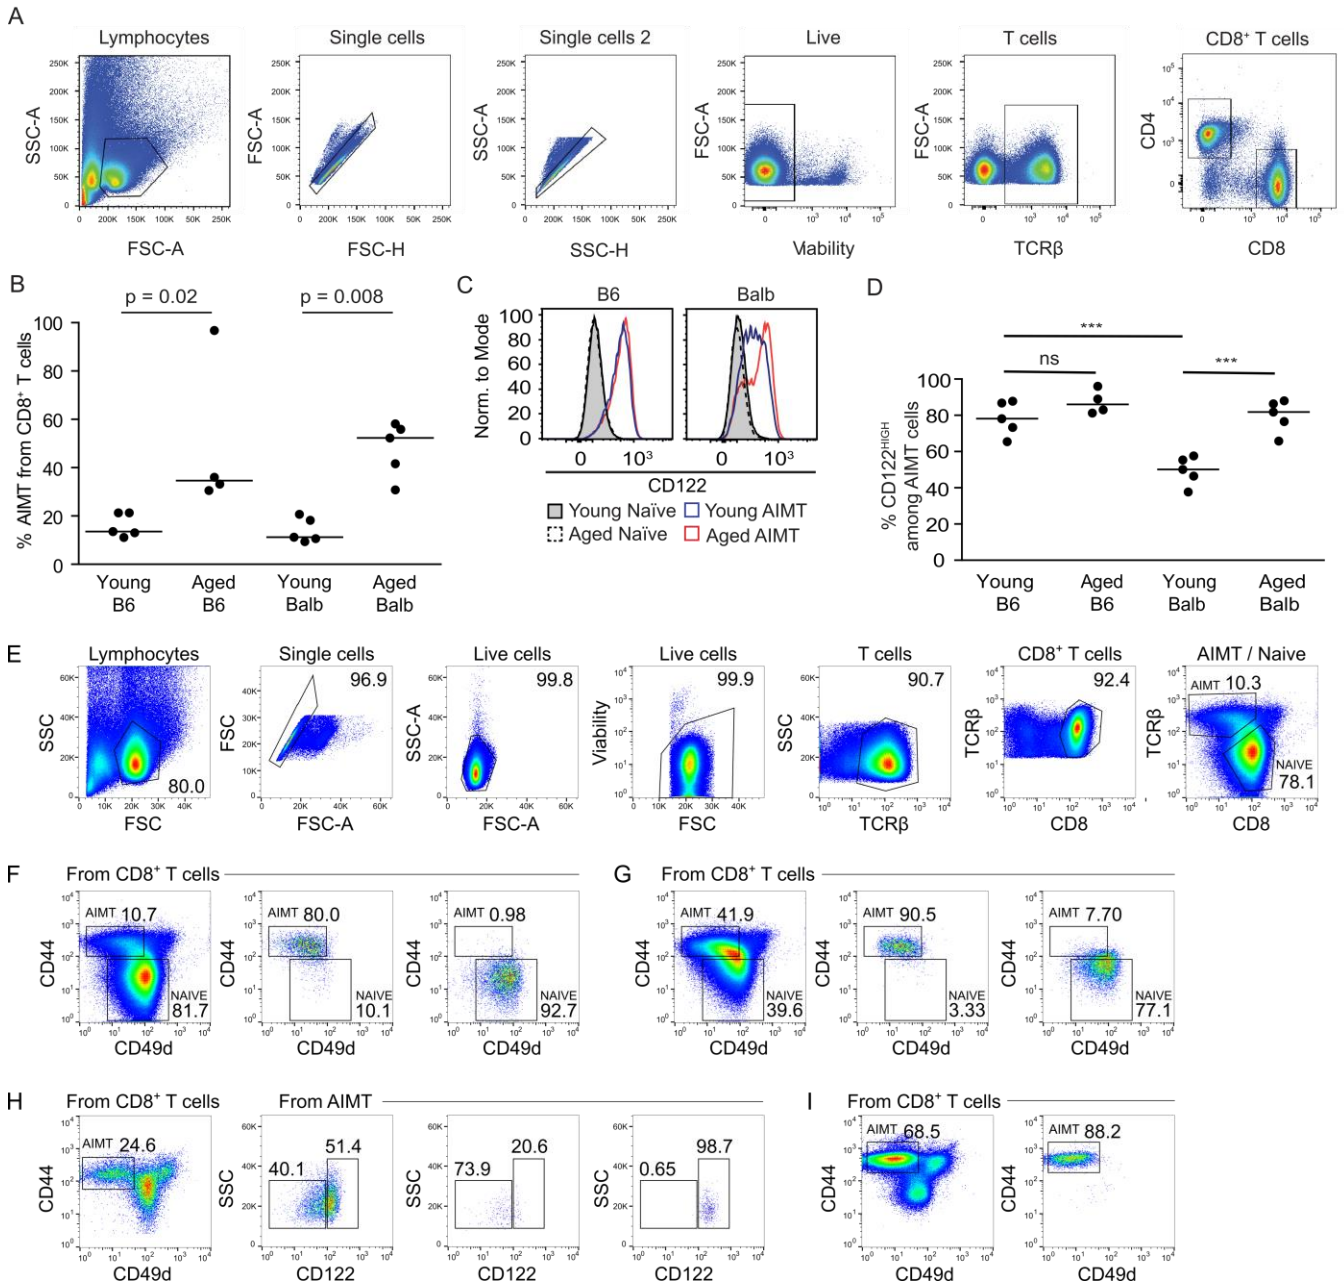

## Supplemental Figure 1.

(A) Gating strategy for gating of CD8<sup>+</sup> T cells in the flow cytometry experiments shown in this study.

(B-D) Analysis of lymph nodes from the same mice as in the experiments in Figure 1A-D. Median.

(B) Quantification of the percentage of CD44<sup>+</sup> CD49d<sup>-</sup> AIMT cells among CD8 T cells. n=4 (Balb) or 5 (B6) mice from 2-5 independent experiments. The statistical significance was tested using 2-tailed Mann-Whitney test.

(C) Histograms of CD122 expression in CD44<sup>-</sup> naïve and CD44<sup>+</sup> CD49d<sup>-</sup> AIMT cells from indicated mice. A representative experiment out of two in total.

(D) Quantification of CD122<sup>HIGH</sup> cells among CD8<sup>+</sup> AIMT cells. Median. The statistical significance was tested using 1-way ANOVA ( $p < 0.0001$ ) with Bonferroni's Multiple Comparison (post)Tests. \*\*\*  $p \leq 0.001$ .

(E-I) Gating strategies and re-analyses for cell sorting for the mRNA sequencing experiment shown in Fig 3. Representative samples per condition out of 3 in total are shown.

(E) General gating strategy for gating AIMT/Naïve CD8<sup>+</sup> T cells for sorting.

(F-G) Naïve and AIMT cell gates for pre-sorted cells (left) and re-analyses of the sorted samples (AIMT – center, Naïve – right) from young B6 (F) or Balb (G) mice.

(H) AIMT cell gate for pre-sorted cells in aged Balb mice (1<sup>st</sup> panel from the left). Sorting gate (2<sup>nd</sup> panel) and re-analyses of the sorted samples from aged Balb mice (3<sup>rd</sup> panel – CD122<sup>LOW</sup> AIMT, 4<sup>th</sup> panel – CD122<sup>HIGH</sup> AIMT).

(I) AIMT cell gate for pre-sorted cells (left) and re-analysis (right) of the sorted sample from aged B6 mice.

**Figure S2**

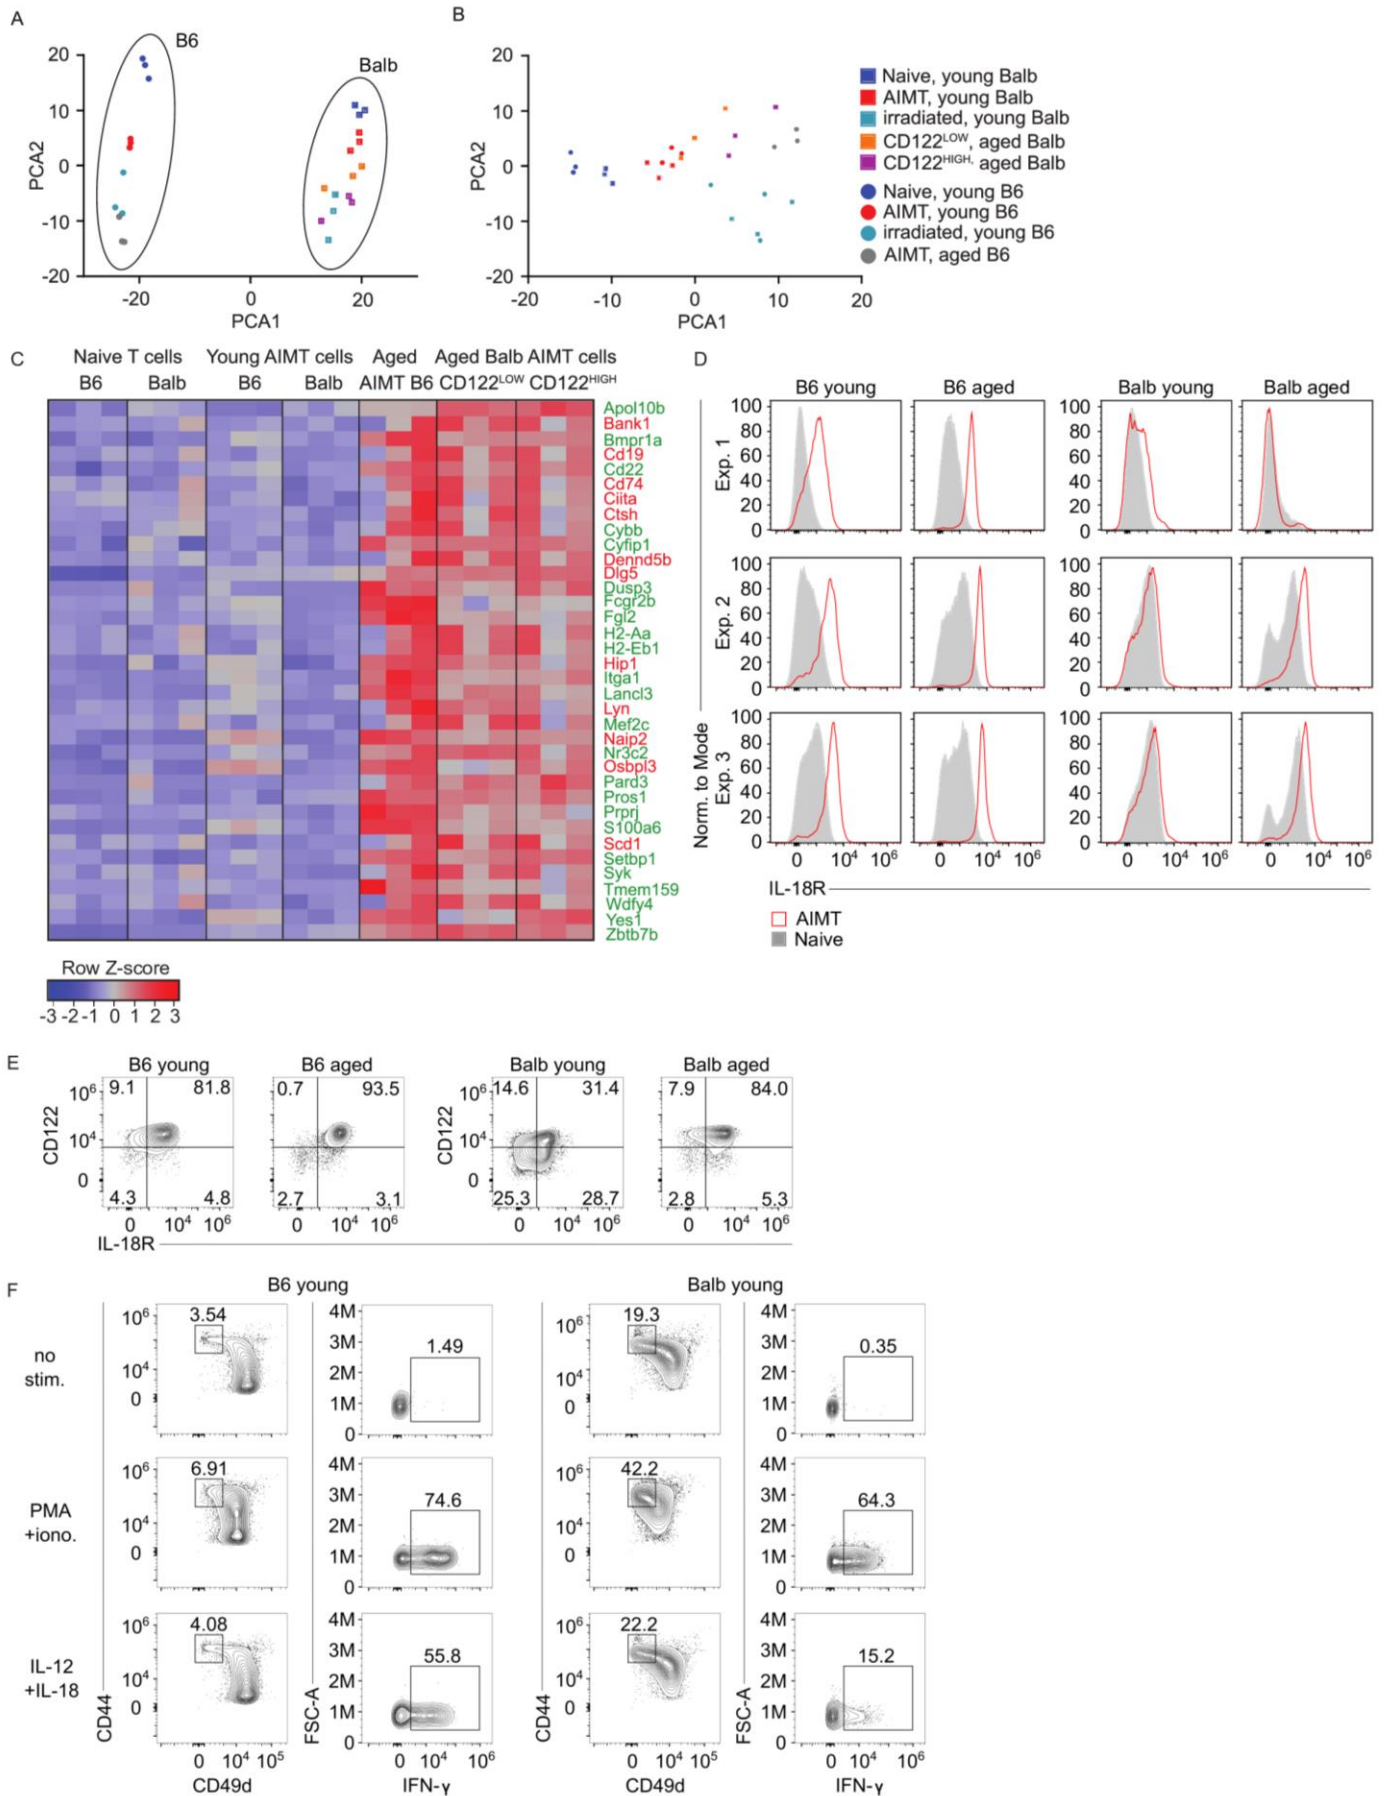

## Supplemental Figure 2.

(A-B) PCA analysis (top 500 variable genes) of the gene expression profiles of the individual samples (Fig. S1E-I, Fig. 3) prior to the normalization between strains (A) and after removing genes differentially expressed between strains (B).

(C) Heatmap showing relative expression of 36 genes showing significant upregulation in AIMT cells from aged mice in comparison to AIMT cells in young mice in B6 and Balb strains (both in CD122<sup>HIGH</sup> and CD122<sup>LOW</sup> AIMT cells from aged Balb mice). Names of genes upregulated in AIMT cells from aged B6 mice in comparison to young B6 mice in the previously published dataset [36] are in green.

(D) Surface levels of IL-18R in naïve and AIMT CD8<sup>+</sup> T cells from young and aged Balb and B6 mice measured by flow cytometry. Supplemental histograms for the experiment shown in Fig. 3G. Three independent experiments are shown.

(E) Surface levels of IL-18R and CD122 in AIMT CD8<sup>+</sup> T cells from young and aged Balb and B6 mice measured by flow cytometry. A representative experiment out of three in total (same experiments as shown in Figure S2D).

(F) Production of IFN- $\gamma$  by AIMT cells (gated as CD8<sup>+</sup> CD44<sup>+</sup> CD49d<sup>-</sup>) isolated from young B6 or Balb mice measured by flow cytometry. Supplemental representative contour plots for the experiment shown in Fig. 3H. A representative experiment out of three in total (same experiments as shown in Figure S2D).

**Figure S3**

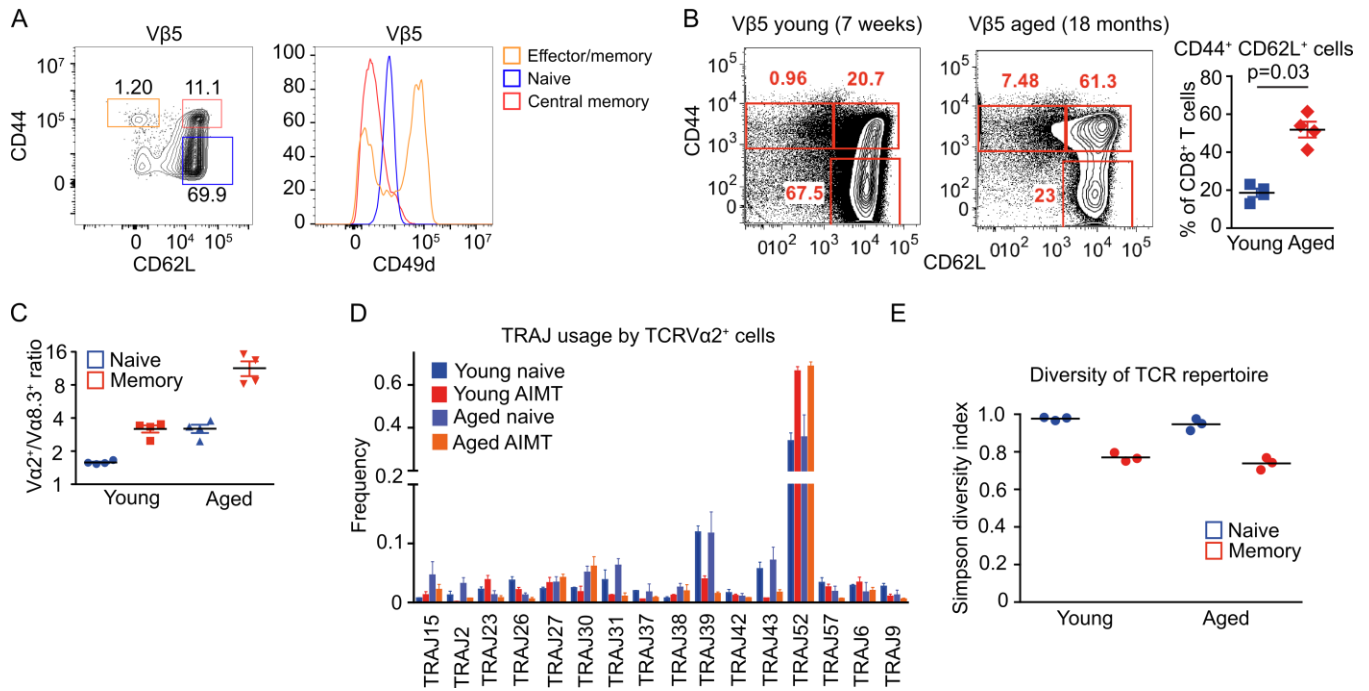

**Supplemental Figure 3.**

(A) Expression of the CD49d marker on naïve (CD44<sup>-</sup> CD62L<sup>+</sup>), central memory phenotype (CD44<sup>+</sup> CD62L<sup>+</sup>), and effector/memory (CD44<sup>+</sup> CD62L<sup>-</sup>) cells in the lymph nodes of young Vβ5 mice. A representative sample is shown out of 5 independent experiments.

(B-C) Analysis of the same young and aged Vβ5 mice as the experiment in Fig. 4A.

(B) Percentage of naïve (CD44<sup>-</sup> CD62L<sup>+</sup>), AIMT (CD44<sup>+</sup> CD62L<sup>+</sup>), and effector/memory (CD44<sup>+</sup> CD62L<sup>-</sup>) cells in the lymph nodes of young and aged mice. Mean ± SEM is shown. A representative experiment and the quantification of 4 mice per group are shown. Statistical significance was calculated using Mann-Whitney test.

(C) Quantification of the ratio between the TCRVα2 and TCRVα8.3 T cells among AIMT or naïve CD8<sup>+</sup> T cells in Vβ5 young or aged mice. Mean ± SEM is shown.

(D) Quantification of the TRAJ usage by the indicated mice. Mean + SEM. Analysis of the same experiment as shown in Fig. 4B-F.

(E) Diversity of the CDR3 among TRAV14 TCRα in naïve and AIMT CD8<sup>+</sup> T cells isolated from Vβ5 mice was estimated using Simpson diversity index. Mean is shown. The statistical significance was calculated using one-way ANOVA with Bonferroni's Multiple Comparison Posttest. ns; p>0.05. Analysis of the same experiment as shown in Fig. 4B-F.

**Figure S4**

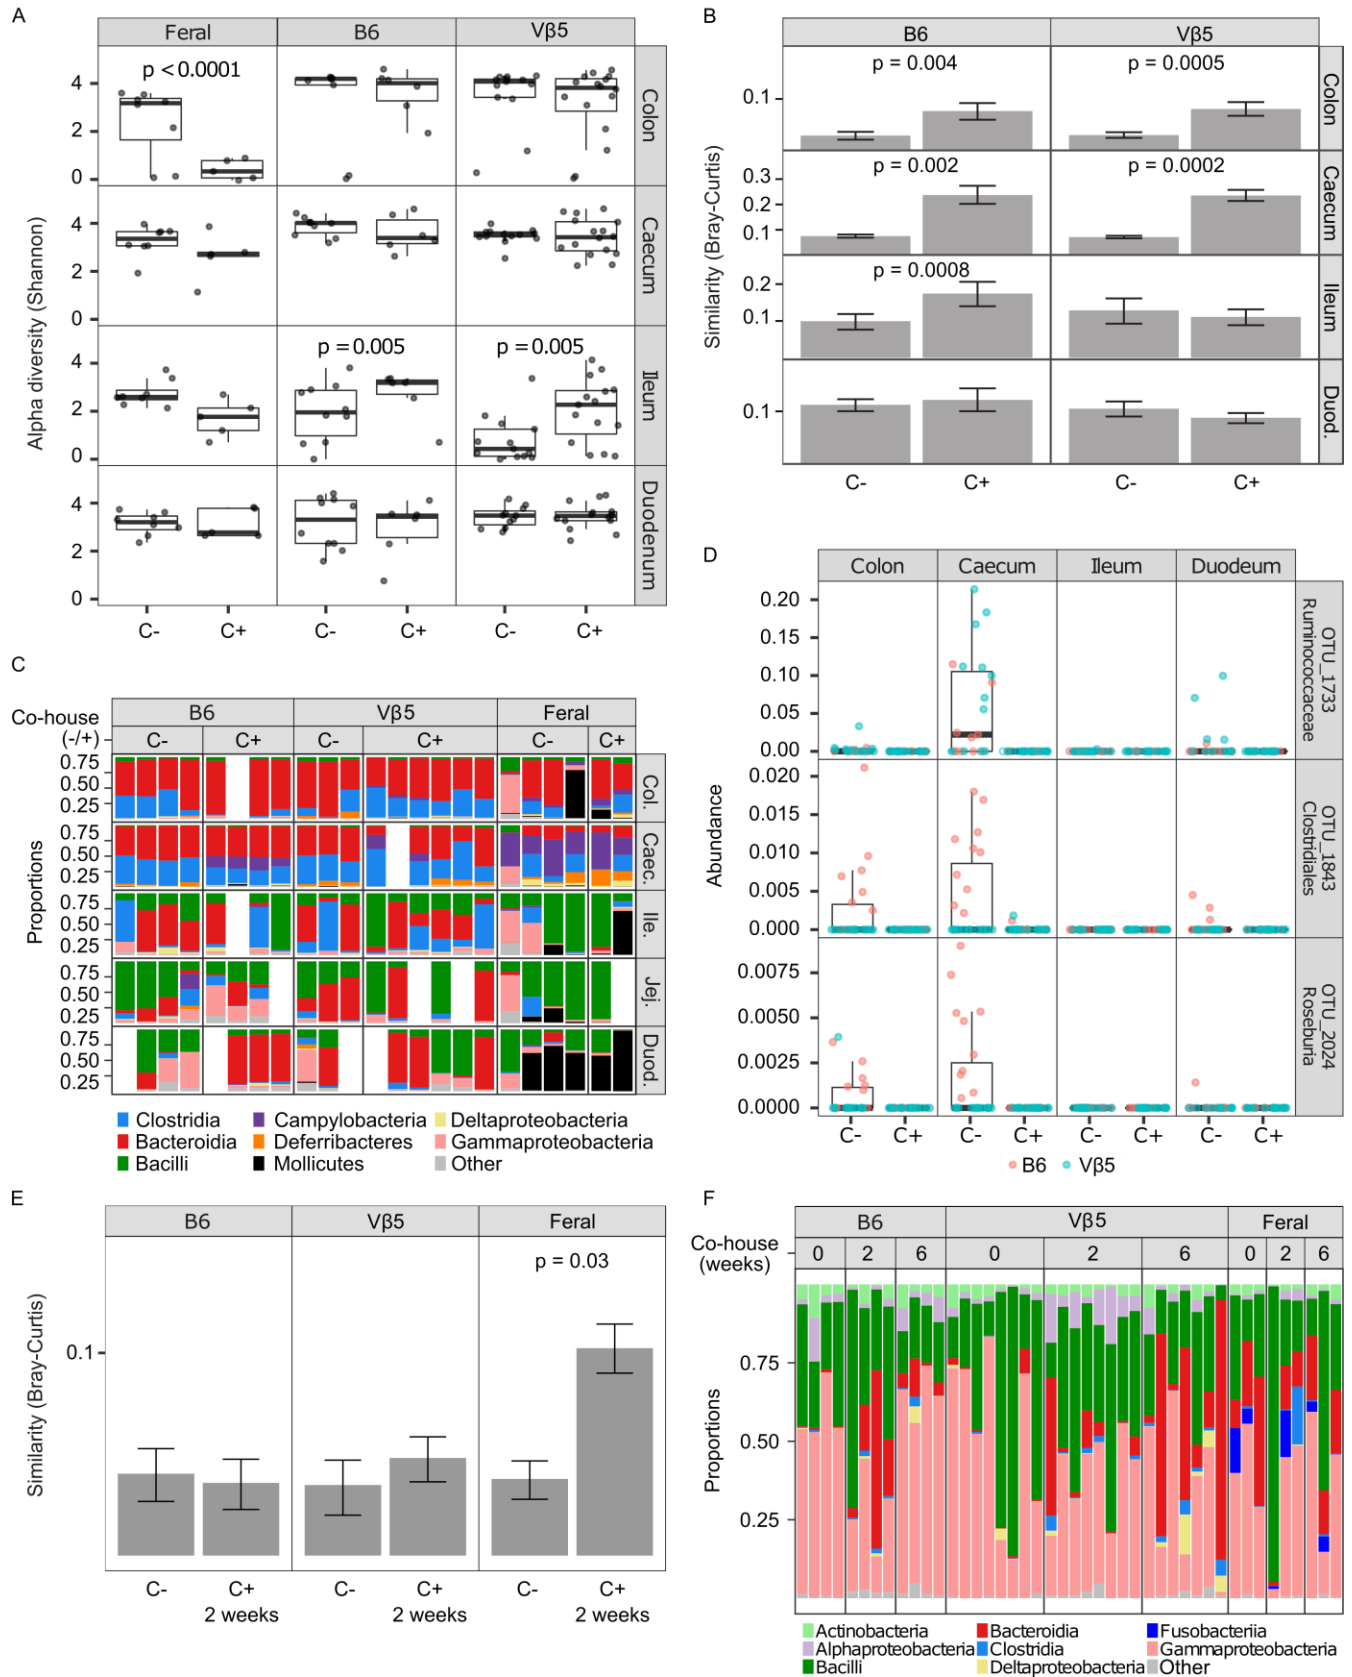

#### Supplemental Figure 4.

(A-B) Analysis of the experiment shown in Figure 6A-C.

(A) Shannon-index based alpha diversity of the gut microbiota of feral and laboratory mice co-housed together (C+) or non-co-housed (C-). The statistical significance was tested using linear mixed effect model, while considering individual identity as a random effect and the effect of treatment level (co-housed vs non-co-housed), gut section, and their interactions as explanatory variables.

(B) Average Bray-Curtis similarity score of intestinal microbiota between laboratory B6 or V $\beta$ 5 mice co-housed (C+) or non-co-housed (C-) with feral mice and non-co-housed feral mice. Error bars correspond to 95% bootstrap confidence intervals, permutation-based p-values are shown for significant differences ( $p < 0.05$ ). Duod. – Duodenum.

(C) Taxonomical composition of the intestinal microbiota of laboratory co-housed (C+) and non-co-housed (C-) B6, V $\beta$ 5, and feral mice (Experiment A, see Methods). Color bars represent proportions of dominant bacterial classes in each sample. Col. – Colon, Caec. – Caecum, Ile. – Ileum, Jej. – Jejunum, Duod. – Duodenum.

(D) Three most abundant operational taxonomic units with lower relative abundance in co-housed (C+) than non-co-housed (C-) B6 and V $\beta$ 5 laboratory mice. (Experiment B, see Methods).

(E) Average Bray-Curtis similarity of the salivary microbiota of co-housed (C+) or non-co-housed (C-) laboratory B6 or V $\beta$ 5 mice with feral mice to conventional feral mice (left, center), or co-housed or non-co-housed feral mice to laboratory B6 and V $\beta$ 5 controls (right) in the experiment shown in Figure 6D. Error bars correspond to 95% bootstrap confidence intervals. Permutation-based p-value is shown for significant differences ( $p < 0.05$ ).

(F) Taxonomical composition of the salivary microbiota of laboratory B6 or V $\beta$ 5 mice co-housed vs. non-co-housed with feral mice (Experiment A, see Methods). Color bars represent proportions of dominant bacterial classes in each sample. Samples were collected from each mouse prior to the co-housing (0 weeks) and after 2 and 6 weeks during the co-housing experiment.
